# Supplementary material for: Recent introgression between Taiga Bean Goose and Tundra Bean Goose results in a largely homogeneous landscape of genetic differentiation
Source: PubMed Central journal article supplement (PMC7413267; doi:10.1038/s41437-020-0322-z), 2020-05-26

## Supplementary Material

Table S1. Overview of sampling locations

Table S2. Mapping and coverage statistics for all samples.

Table S3. Correlations between  $F_{ST}$ ,  $d_{XY}$  and  $\pi$  for different window sizes (10kb, 20kb, 50kb, 100kb and 200kb).

Table S4. Parameter estimates and likelihood scores for different demographic models simulated using DADI. The most likely model is highlighted in grey.

Table S5. Bootstrap analyses of the most likely demographic model. Parameters (with 95% confidence intervals) converted to absolute numbers.

Table S6. Gene content of the top 1% high  $F_{ST}$ -windows.

Figure S1. *ADMIXTURE* and PCA plots for different filtering settings.

Figure S2. *ADMIXTURE* plots for  $K = 2$  to  $K = 4$ . The distribution of cross-validation errors indicates that  $K = 1$  is the best configuration.

Figure S3. The genomic landscape of Taiga and Tundra Bean Goose for relative divergence ( $F_{ST}$ ), absolute divergence ( $d_{XY}$ ) and nucleotide diversity ( $\pi$ ) aligned to chicken chromosomes. The colors in the nucleotide diversity tracks correspond to the Taiga (blue) and the Tundra Bean Goose (red).

Figure S4. Demographic scenarios with and without population expansions and their likelihood scores that were tested with DADI. The most likely model concerns isolation with recent asymmetrical gene flow without any population expansions (log likelihood = -31,804).

**Table S1.** Information about sampling locations for all goose specimens in this study. Species identity of Finnish samples based on mitochondrial DNA sequencing, other samples based on morphology.

| SampleName | Code         | Species                | Collection                  | Location                     | Country         |
|------------|--------------|------------------------|-----------------------------|------------------------------|-----------------|
| AnFa01U01  | NRM 20006276 | <i>A. fabalis</i>      | Museum Stockholm            | Kristianstad, Trolle-Ljungby | Sweden          |
| AnFa01U02  | NRM 20006268 | <i>A. fabalis</i>      | Museum Stockholm            | NA                           | Sweden          |
| AnFa01U03  | 20A2012      | <i>A. fabalis</i>      | J. Honka/University of Oulu | Lokka Tekoallas              | Finland         |
| AnFa01U04  | 25C2012      | <i>A. fabalis</i>      | J. Honka/University of Oulu | Liminka                      | Finland         |
| AnFa01U05  | 112012       | <i>A. fabalis</i>      | J. Honka/University of Oulu | Selänpää                     | Finland         |
| AnFa01U06  | 232012       | <i>A. fabalis</i>      | J. Honka/University of Oulu | Kankaanpää                   | Finland         |
| AnFa01U07  | 242012       | <i>A. fabalis</i>      | J. Honka/University of Oulu | Pudasjärvi                   | Finland         |
| AnFa01U08  | 33B2012      | <i>A. fabalis</i>      | J. Honka/University of Oulu | Vaala                        | Finland         |
| AnFa01U09  | 32A2012      | <i>A. fabalis</i>      | J. Honka/University of Oulu | Toholampi                    | Finland         |
| AnRo01F01  | 255-349      | <i>A. serrirostris</i> | G. Müskens                  | Maren-Kessel                 | The Netherlands |
| AnRo01M01  | 255-346      | <i>A. serrirostris</i> | G. Müskens                  | Maren-Kessel                 | The Netherlands |
| AnRo01U01  | 362012       | <i>A. serrirostris</i> | J. Honka/University of Oulu | Kittilä                      | Finland         |
| AnRo01U02  | 102012       | <i>A. serrirostris</i> | J. Honka/University of Oulu | Rääkkylä                     | Finland         |
| AnRo01U03  | 192012       | <i>A. serrirostris</i> | J. Honka/University of Oulu | Hamina                       | Finland         |
| AnRo01U04  | 14B2012      | <i>A. serrirostris</i> | J. Honka/University of Oulu | Virolahti                    | Finland         |
| AnRo01U05  | 382012       | <i>A. serrirostris</i> | J. Honka/University of Oulu | Tyrnävä                      | Finland         |
| AnRo01U06  | 22B2012      | <i>A. serrirostris</i> | J. Honka/University of Oulu | Joutseno                     | Finland         |
| AnRo01U07  | 412012       | <i>A. serrirostris</i> | J. Honka/University of Oulu | Salo                         | Finland         |

**Table S2.** Mapping statistics for all samples.

| <b>Sample</b> | <b>Number of reads</b> | <b>Mapped reads</b>  | <b>Mean Coverage</b> |
|---------------|------------------------|----------------------|----------------------|
| AnFa01U01     | 312,362,054            | 304,812,645 (97.58%) | 38.30X               |
| AnFa01U02     | 325,099,485            | 314,649,926 (96.79%) | 39.58X               |
| AnFa01U03     | 387,180,588            | 359,734,515 (92.91%) | 40.05X               |
| AnFa01U04     | 313,424,653            | 262,454,848 (83.74%) | 30.73X               |
| AnFa01U05     | 322,101,618            | 305,479,772 (94.84%) | 37.62X               |
| AnFa01U06     | 392,536,125            | 365,170,541 (93.03%) | 42.99X               |
| AnFa01U07     | 340,473,167            | 325,662,754 (95.65%) | 38.84X               |
| AnFa01U08     | 326,353,112            | 302,622,885 (92.73%) | 36.00X               |
| AnFa01U09     | 371,017,606            | 334,170,460 (90.07%) | 38.41X               |
| AnRo01F01     | 319,819,026            | 308,937,936 (96.6%)  | 38.90X               |
| AnRo01M01     | 363,607,500            | 352,523,736 (96.95%) | 43.93X               |
| AnRo01U01     | 358,627,964            | 318,316,595 (88.76%) | 35.36X               |
| AnRo01U02     | 344,639,151            | 310,242,537 (90.02%) | 34.87X               |
| AnRo01U03     | 338,470,668            | 317,514,405 (93.81%) | 36.84X               |
| AnRo01U04     | 369,079,405            | 337,993,551 (91.58%) | 39.45X               |
| AnRo01U05     | 346,764,567            | 312,937,204 (90.24%) | 32.71X               |
| AnRo01U06     | 304,353,937            | 277,986,328 (91.34%) | 33.57X               |
| AnRo01U07     | 329,727,996            | 299,965,175 (90.97%) | 34.74X               |

**Table S3.** Correlations between summary statistics ( $F_{st}$ ,  $D_{xy}$  and  $\pi$ ) for different window sizes.

| <b>Correlation</b> | <b>Window Size</b> | <b>Spearman <math>\rho</math></b> | <b>S-statistic</b> | <b>p-value</b> |
|--------------------|--------------------|-----------------------------------|--------------------|----------------|
| Fst - Dxy          | 10kb               | 0.13                              | 1.31e14            | < 2.2e-16      |
|                    | 20kb               | 0.14                              | 2.27e13            | < 2.2e-16      |
|                    | 50kb               | 0.13                              | 1.68e12            | < 2.2e-16      |
|                    | 100kb              | 0.13                              | 2.29e11            | < 2.2e-16      |
|                    | 200kb              | 0.14                              | 3.28e10            | < 2.2e-16      |
| Fst – Mean $\pi$   | 10kb               | -0.044                            | 1.58e14            | < 2.2e-16      |
|                    | 20kb               | -0.051                            | 2.78e13            | < 2.2e-16      |
|                    | 50kb               | -0.088                            | 2.11e12            | < 2.2e-16      |
|                    | 100kb              | -0.094                            | 2.87e11            | < 2.2e-16      |
|                    | 200kb              | -0.088                            | 4.13e10            | < 2.2e-16      |
| Dxy – Mean $\pi$   | 10kb               | 0.88                              | 1.75e13            | < 2.2e-16      |
|                    | 20kb               | 0.90                              | 2.76e12            | < 2.2e-16      |
|                    | 50kb               | 0.91                              | 1.80e11            | < 2.2e-16      |
|                    | 100kb              | 0.91                              | 2.28e10            | < 2.2e-16      |
|                    | 200kb              | 0.91                              | 3.45e9             | < 2.2e-16      |

**Table S4.** Parameter estimates and likelihood scores for different demographic models simulated using DADI.

| <b>Model: Strict Isolation (no migration)</b>                   |      |      |       |            |            |            |  |
|-----------------------------------------------------------------|------|------|-------|------------|------------|------------|--|
| Run                                                             | N1   | N2   | T     | Likelihood |            |            |  |
| 1                                                               | 3.66 | 3.13 | 0.19  | -472,672   |            |            |  |
| 2                                                               | 2.12 | 2.17 | 0.19  | -501,858   |            |            |  |
| 3                                                               | 4.03 | 3.10 | 0.22  | -554,411   |            |            |  |
| 4                                                               | 4.45 | 2.64 | 0.22  | -560,482   |            |            |  |
| 5                                                               | 3.40 | 4.59 | 0.25  | -628,042   |            |            |  |
| 6                                                               | 7.22 | 9.05 | 0.27  | -733,355   |            |            |  |
| 7                                                               | 3.23 | 2.80 | 0.30  | -737,060   |            |            |  |
| 8                                                               | 2.47 | 3.50 | 0.30  | -750,695   |            |            |  |
| 9                                                               | 4.19 | 5.58 | 0.32  | -777,150   |            |            |  |
| 10                                                              | 5.71 | 5.87 | 0.35  | -837,773   |            |            |  |
| <b>Model: Isolation with continuous, symmetrical migration</b>  |      |      |       |            |            |            |  |
| Run                                                             | N1   | N2   | T     | m          | Likelihood |            |  |
| 1                                                               | 0.86 | 0.82 | 7.65  | 8.10       | -86,672    |            |  |
| 2                                                               | 1.03 | 1.00 | 9.83  | 6.63       | -86,673    |            |  |
| 3                                                               | 0.67 | 0.65 | 5.54  | 9.95       | -86,757    |            |  |
| 4                                                               | 1.05 | 1.01 | 9.13  | 7.23       | -87,137    |            |  |
| 5                                                               | 1.27 | 1.20 | 9.44  | 5.36       | -87,420    |            |  |
| 6                                                               | 1.00 | 0.96 | 6.65  | 7.17       | -87,664    |            |  |
| 7                                                               | 0.63 | 0.69 | 4.80  | 9.55       | -87,972    |            |  |
| 8                                                               | 0.92 | 0.88 | 4.89  | 7.31       | -88,887    |            |  |
| 9                                                               | 0.56 | 0.59 | 4.61  | 9.76       | -89,418    |            |  |
| 10                                                              | 1.02 | 0.85 | 9.63  | 9.56       | -89,783    |            |  |
| <b>Model: Isolation with continuous, asymmetrical migration</b> |      |      |       |            |            |            |  |
| Run                                                             | N1   | N2   | T     | m12        | m21        | Likelihood |  |
| 1                                                               | 0.57 | 0.35 | 12.91 | 12.12      | 20.54      | -86,093    |  |
| 2                                                               | 0.68 | 0.45 | 10.97 | 10.37      | 15.64      | -86,101    |  |

|    |      |      |       |       |       |         |  |  |
|----|------|------|-------|-------|-------|---------|--|--|
| 3  | 0.87 | 0.61 | 12.08 | 8.45  | 11.29 | -86,277 |  |  |
| 4  | 0.61 | 0.33 | 15.67 | 9.96  | 20.82 | -86,381 |  |  |
| 5  | 1.39 | 1.06 | 14.74 | 5.39  | 6.71  | -86,439 |  |  |
| 6  | 0.58 | 0.65 | 7.96  | 12.36 | 10.15 | -86,576 |  |  |
| 7  | 0.69 | 0.79 | 10.01 | 11.41 | 9.16  | -87,050 |  |  |
| 8  | 0.86 | 0.40 | 16.88 | 6.27  | 18.52 | -87,292 |  |  |
| 9  | 0.56 | 1.06 | 12.42 | 14.18 | 5.11  | -88,885 |  |  |
| 10 | 0.76 | 0.62 | 11.02 | 6.77  | 9.55  | -89,139 |  |  |

**Model: Isolation with ancient, asymmetrical migration**

| Run | N1   | N2   | Ts    | Tm    | m12   | m21   | Likelihood |
|-----|------|------|-------|-------|-------|-------|------------|
| 1   | 0.63 | 0.54 | 20.77 | 4.81  | 10.77 | 13.10 | -82,311    |
| 2   | 0.81 | 0.91 | 8.46  | 5.85  | 9.10  | 7.27  | -83,649    |
| 3   | 0.67 | 0.95 | 12.80 | 5.26  | 11.89 | 7.64  | -83,654    |
| 4   | 0.85 | 0.62 | 5.36  | 14.23 | 7.73  | 11.09 | -86,144    |
| 5   | 1.41 | 1.30 | 15.45 | 18.94 | 5.11  | 5.30  | -86,161    |
| 6   | 1.48 | 1.42 | 17.11 | 19.45 | 4.86  | 4.97  | -86,162    |
| 7   | 1.35 | 1.18 | 19.33 | 25.71 | 5.26  | 6.03  | -86,275    |
| 8   | 0.90 | 0.84 | 9.59  | 18.49 | 7.73  | 8.39  | -86,310    |
| 9   | 1.09 | 1.11 | 15.20 | 23.40 | 6.54  | 6.02  | -86,393    |
| 10  | 0.90 | 0.50 | 19.18 | 18.69 | 9.85  | 15.72 | -87,764    |

**Model: Isolation with recent asymmetrical migration**

| Run | N1   | N2   | Ts    | Tm   | m12  | m21   | Likelihood |
|-----|------|------|-------|------|------|-------|------------|
| 1   | 1.36 | 0.68 | 14.36 | 0.33 | 2.89 | 14.61 | -31,804    |
| 2   | 1.25 | 0.52 | 12.50 | 0.32 | 2.32 | 13.82 | -33,056    |
| 3   | 1.52 | 0.51 | 14.53 | 0.32 | 2.46 | 12.44 | -33,341    |
| 4   | 1.62 | 0.64 | 13.73 | 0.38 | 2.53 | 14.71 | -34,482    |
| 5   | 1.53 | 0.66 | 9.07  | 0.30 | 2.62 | 13.20 | -37,541    |
| 6   | 1.74 | 0.72 | 9.88  | 0.35 | 2.31 | 11.08 | -37,603    |
| 7   | 1.88 | 0.70 | 12.93 | 0.47 | 2.26 | 11.88 | -37,701    |
| 8   | 1.19 | 0.77 | 13.98 | 0.37 | 2.15 | 12.95 | -39,288    |

|    |      |      |       |      |      |       |         |  |
|----|------|------|-------|------|------|-------|---------|--|
| 9  | 1.40 | 0.69 | 7.44  | 0.30 | 2.90 | 13.08 | -40,626 |  |
| 10 | 1.52 | 0.86 | 11.04 | 0.43 | 2.20 | 10.84 | -41,249 |  |
|    |      |      |       |      |      |       |         |  |

**Model: Isolation with recent asymmetrical migration and population expansion (pop1)**

| Run | s    | N1   | N2   | Ts    | Tm   | m12   | m21  | Likelihood |
|-----|------|------|------|-------|------|-------|------|------------|
| 1   | 0.66 | 0.86 | 0.93 | 13.25 | 4.86 | 9.48  | 6.91 | -83,236    |
| 2   | 0.42 | 0.70 | 0.70 | 19.03 | 4.46 | 16.23 | 8.05 | -83,521    |
| 3   | 0.95 | 0.57 | 0.78 | 11.75 | 5.05 | 10.56 | 6.93 | -83,721    |
| 4   | 0.70 | 0.81 | 1.11 | 9.81  | 4.26 | 10.04 | 4.54 | -84,019    |
| 5   | 0.50 | 1.06 | 0.97 | 12.00 | 5.01 | 10.44 | 6.87 | -84,024    |
| 6   | 0.30 | 1.23 | 0.93 | 17.03 | 4.70 | 17.15 | 6.70 | -84,996    |
| 7   | 0.46 | 1.45 | 1.06 | 20.34 | 4.93 | 13.44 | 4.18 | -85,494    |
| 8   | 0.48 | 0.70 | 0.84 | 17.05 | 9.52 | 13.15 | 7.89 | -87,625    |
| 9   | 0.34 | 1.05 | 0.90 | 15.98 | 9.10 | 12.66 | 7.12 | -89,796    |
| 10  | 0.42 | 0.60 | 0.68 | 15.07 | 3.45 | 18.74 | 5.04 | -90,285    |

**Model: Isolation with recent asymmetrical migration and population expansion (pop2)**

| Run | s    | N1   | N2   | Ts    | Tm   | m12  | m21   | Likelihood |
|-----|------|------|------|-------|------|------|-------|------------|
| 1   | 0.59 | 1.00 | 0.50 | 16.15 | 5.46 | 6.33 | 11.37 | -82,837    |
| 2   | 0.66 | 0.87 | 0.84 | 15    | 5.54 | 7.10 | 9.91  | -82,866    |
| 3   | 0.73 | 1.25 | 0.58 | 10.86 | 4.82 | 4.25 | 10.50 | -82,943    |
| 4   | 0.45 | 1.07 | 0.74 | 9.12  | 4.14 | 5.73 | 12.47 | -82,952    |
| 5   | 0.44 | 0.97 | 0.64 | 21.51 | 5.88 | 5.72 | 15.42 | -83,569    |
| 6   | 0.46 | 0.71 | 1.47 | 15.78 | 4.62 | 8.99 | 11.74 | -83,631    |
| 7   | 0.79 | 1.12 | 0.79 | 12.84 | 5.70 | 7.51 | 8.12  | -83,755    |
| 8   | 0.39 | 1.00 | 0.57 | 6.33  | 5.38 | 6.50 | 14.70 | -86,103    |
| 9   | 0.60 | 1.23 | 0.59 | 15.86 | 4.88 | 5.35 | 11.42 | -86,295    |
| 10  | 0.84 | 0.83 | 0.59 | 12.05 | 4.33 | 9.69 | 13.03 | -86,528    |

**Model: Isolation with recent asymmetrical migration and population expansion (pop1&2)**

| Run | s    | N1   | N2   | Ts    | Tm   | m12   | m21   | Likelihood |
|-----|------|------|------|-------|------|-------|-------|------------|
| 1   | 0.44 | 1.05 | 1.11 | 20.33 | 4.07 | 13.37 | 11.14 | -83,672    |

|    |      |      |      |       |      |       |       |         |
|----|------|------|------|-------|------|-------|-------|---------|
| 2  | 0.58 | 1.79 | 0.67 | 11.98 | 3.56 | 9.91  | 16.38 | -84,589 |
| 3  | 0.42 | 0.97 | 1.71 | 18.33 | 4.17 | 14.66 | 10.93 | -85,346 |
| 4  | 0.36 | 1.02 | 0.74 | 14.39 | 3.63 | 22.02 | 9.95  | -87,289 |
| 5  | 0.30 | 1.84 | 1.46 | 13.11 | 3.01 | 19.92 | 7.57  | -87,572 |
| 6  | 0.54 | 0.98 | 0.45 | 16.96 | 7.50 | 9.01  | 15.34 | -87,604 |
| 7  | 0.72 | 1.39 | 1.24 | 12.21 | 4.71 | 8.56  | 14.63 | -88,112 |
| 8  | 0.25 | 0.65 | 0.45 | 9.75  | 8.76 | 11.95 | 11.80 | -89,263 |
| 9  | 0.31 | 0.94 | 0.91 | 20.32 | 7.72 | 14.99 | 7.17  | -89,619 |
| 10 | 0.65 | 0.75 | 0.78 | 10.39 | 7.43 | 9.32  | 10.10 | -90,479 |



| Bootstrap Analyses                |                            |      |                                         |      |      |       |            |
|-----------------------------------|----------------------------|------|-----------------------------------------|------|------|-------|------------|
| Run                               | N1                         | N2   | Ts                                      | Tm   | m12  | m21   | Likelihood |
| 1                                 | 1.36                       | 0.70 | 15.90                                   | 0.32 | 2.77 | 14.29 | -8.218     |
| 2                                 | 1.47                       | 0.58 | 13.30                                   | 0.33 | 2.66 | 13.97 | -8.253     |
| 3                                 | 1.26                       | 0.56 | 15.46                                   | 0.35 | 2.21 | 14.54 | -8.615     |
| 4                                 | 1.50                       | 0.77 | 11.91                                   | 0.40 | 2.40 | 11.18 | -10.245    |
| 5                                 | 1.30                       | 0.57 | 14.72                                   | 0.22 | 2.88 | 14.72 | -11.156    |
| 6                                 | 1.49                       | 0.80 | 11.19                                   | 0.42 | 2.41 | 10.70 | -11.312    |
| 7                                 | 1.07                       | 0.53 | 15.20                                   | 0.22 | 2.70 | 15.87 | -11.935    |
| 8                                 | 1.34                       | 0.75 | 15.01                                   | 0.41 | 1.50 | 10.08 | -12.676    |
| 9                                 | 1.15                       | 0.65 | 15.96                                   | 0.22 | 2.78 | 14.14 | -13.463    |
| 10                                | 1.05                       | 0.87 | 14.83                                   | 0.24 | 2.75 | 13.26 | -14.807    |
| Final Results                     |                            |      |                                         |      |      |       |            |
|                                   | Coalescent Units (95 % CI) |      | Absolute Units (95% CI) <sup>1</sup>    |      |      |       |            |
| <b>N (<i>A. fabalis</i>)</b>      | 1.3 (1.2 – 1.4)            |      | 120,508 (110,954 – 130,061) individuals |      |      |       |            |
| <b>N (<i>A. serrirostris</i>)</b> | 0.68 (0.61 – 0.75)         |      | 62,855 (56,102 – 69,608) individuals    |      |      |       |            |
| <b>Ts</b>                         | 14.35 (13.32 – 15.38)      |      | 2,660,798 (2,470,104 – 2,851,492) years |      |      |       |            |
| <b>Tm</b>                         | 0.31 (0.26 – 0.37)         |      | 58,285 (48,651 – 67,918) years          |      |      |       |            |
| <b>m(F → S)</b>                   | 2.51 (2.25 – 2.76)         |      | 0.0000121 (0.0000014 - 0.0000149)       |      |      |       |            |
| <b>m(S → F)</b>                   | 13.27 (12.07 – 14.48)      |      | 0.0000651 (0.0000651 - 0.0000781)       |      |      |       |            |

<sup>1</sup> Absolute units were calculated using the following formulas and numbers:

$\Theta = 200\ 197$  (theta, output from DADI-analyses)

$\mu = 1e10-9$  (mutation rate)

$L = 539\ 793\ 400$  (length of sequence)

$N = \Theta / (4 * \mu * L)$

$N$  (*A. fabalis*) =  $N1 * N$

$N$  (*A. serrirostris*) =  $N2 * N$

$Ts = Ts * N$

$Tm = Tm * N$

$m(S \rightarrow F) = m12 / 2N$

$m(F \rightarrow S) = m21 / 2N$

**Table S6.** List of candidate genes in the top 1%  $F_{ST}$ -windows.

| <b>Candidate Gene</b> | <b>Putative function (based on Uniprot)</b>          |
|-----------------------|------------------------------------------------------|
| POLB                  | DNA repair                                           |
| VDAC3                 | Channel for diffusion of small hydrophilic molecules |
| ANK1                  | Cytoskeleton organization                            |
| NKX6-3                | Transcription factor (central nervous system?)       |
| AGPAT6                | Involved in several metabolic processes              |
| KCNU1                 | Testis-specific potassium channel                    |
| UNC5D                 | Neuron differentiation                               |
| DUSP26                | Phosphorylation of proteins                          |
| RNF122                | May induce necrosis and apoptosis                    |
| TTI2                  | Regulator of the DNA damage response                 |
| MAK16                 | RNA-binding                                          |
| SLC18A1               | Neurotransmitter transport                           |
| ATP6V1B2              | ATP-binding                                          |
| LZTS1                 | Regulation of cell growth                            |
| GFRA2                 | Receptor for neurturin                               |
| PBDC1                 | Unknown function                                     |
| GLI1                  | Transcriptional activator in development             |
| STAC3                 | Muscle function                                      |

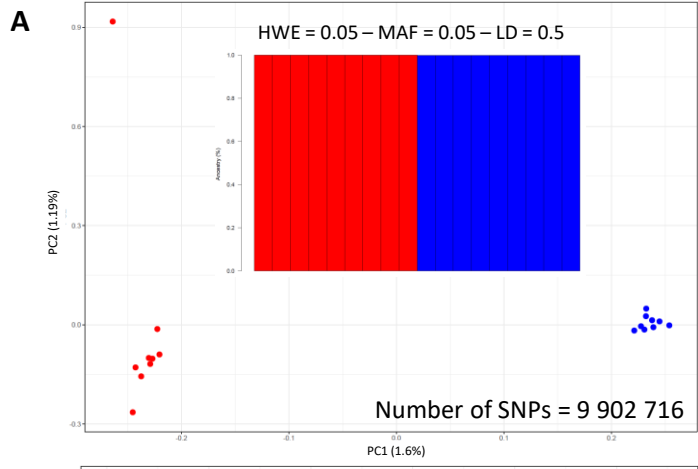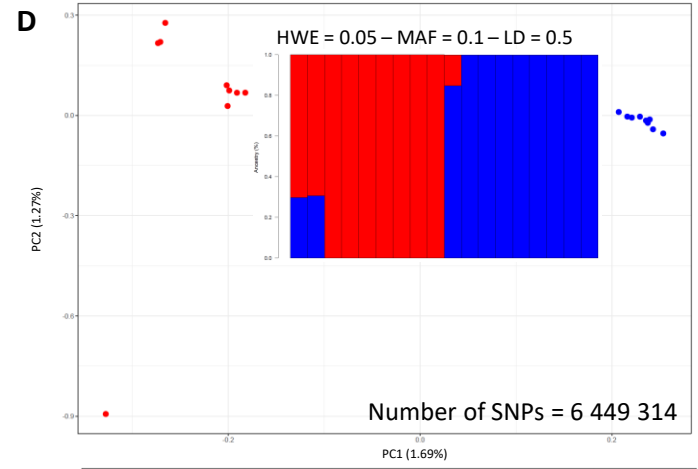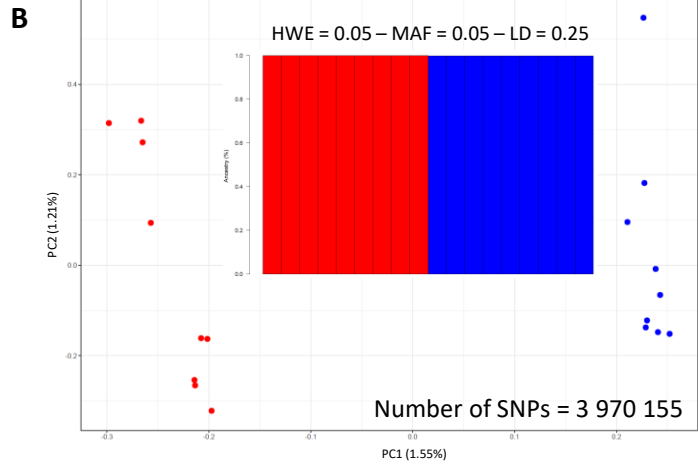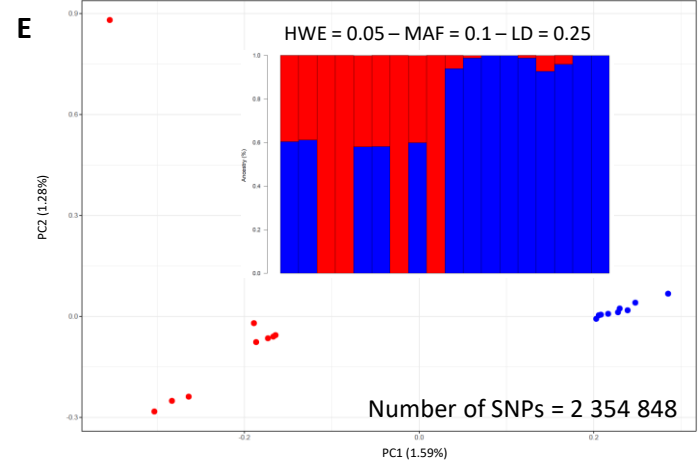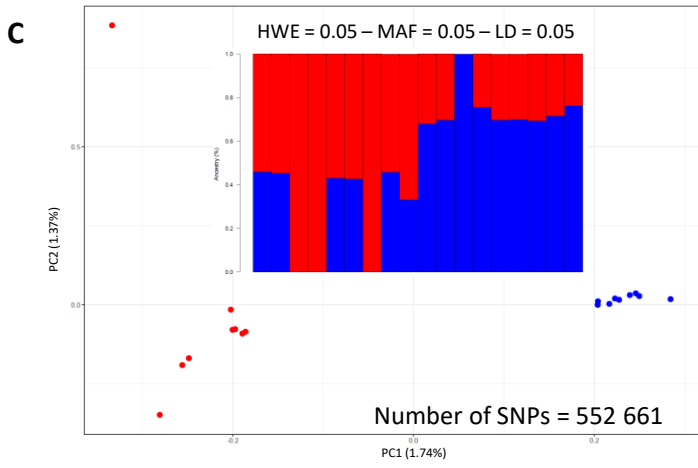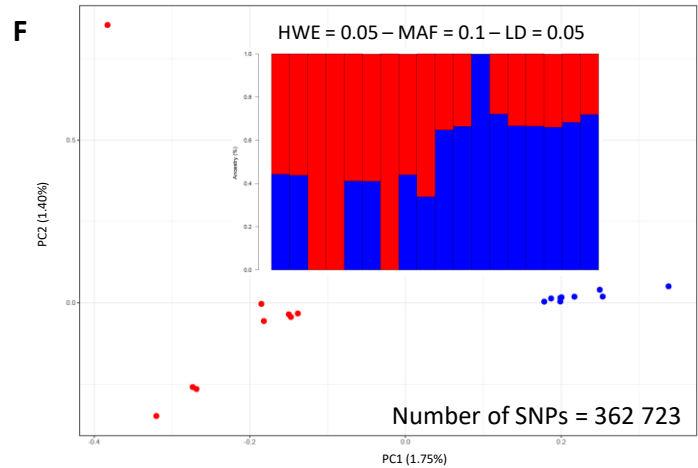

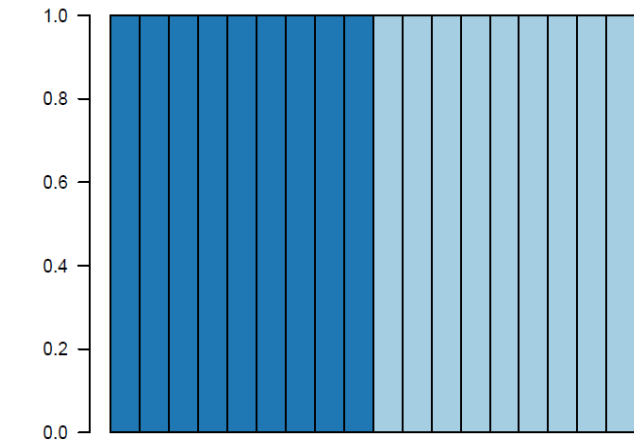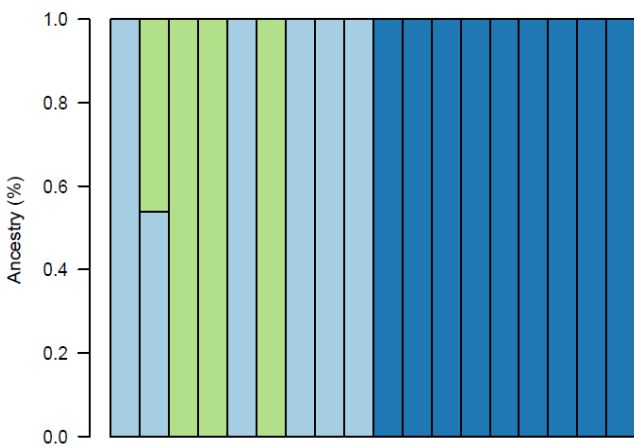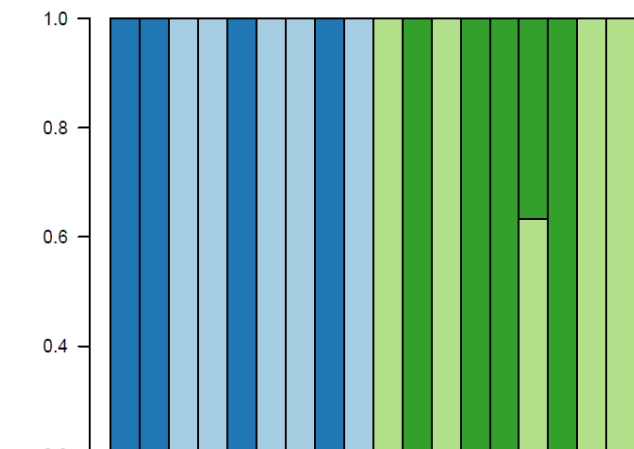

**K=2**

**K=3**

**K=4**

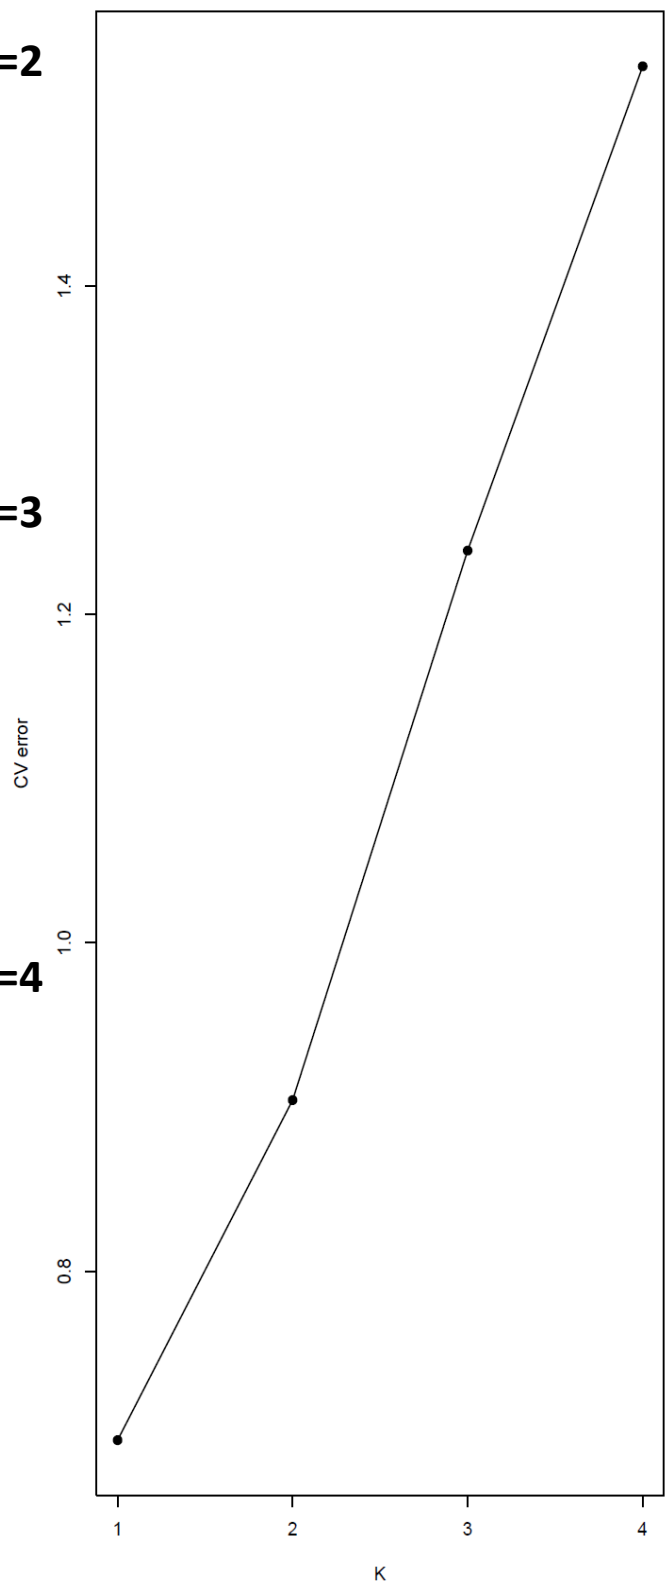

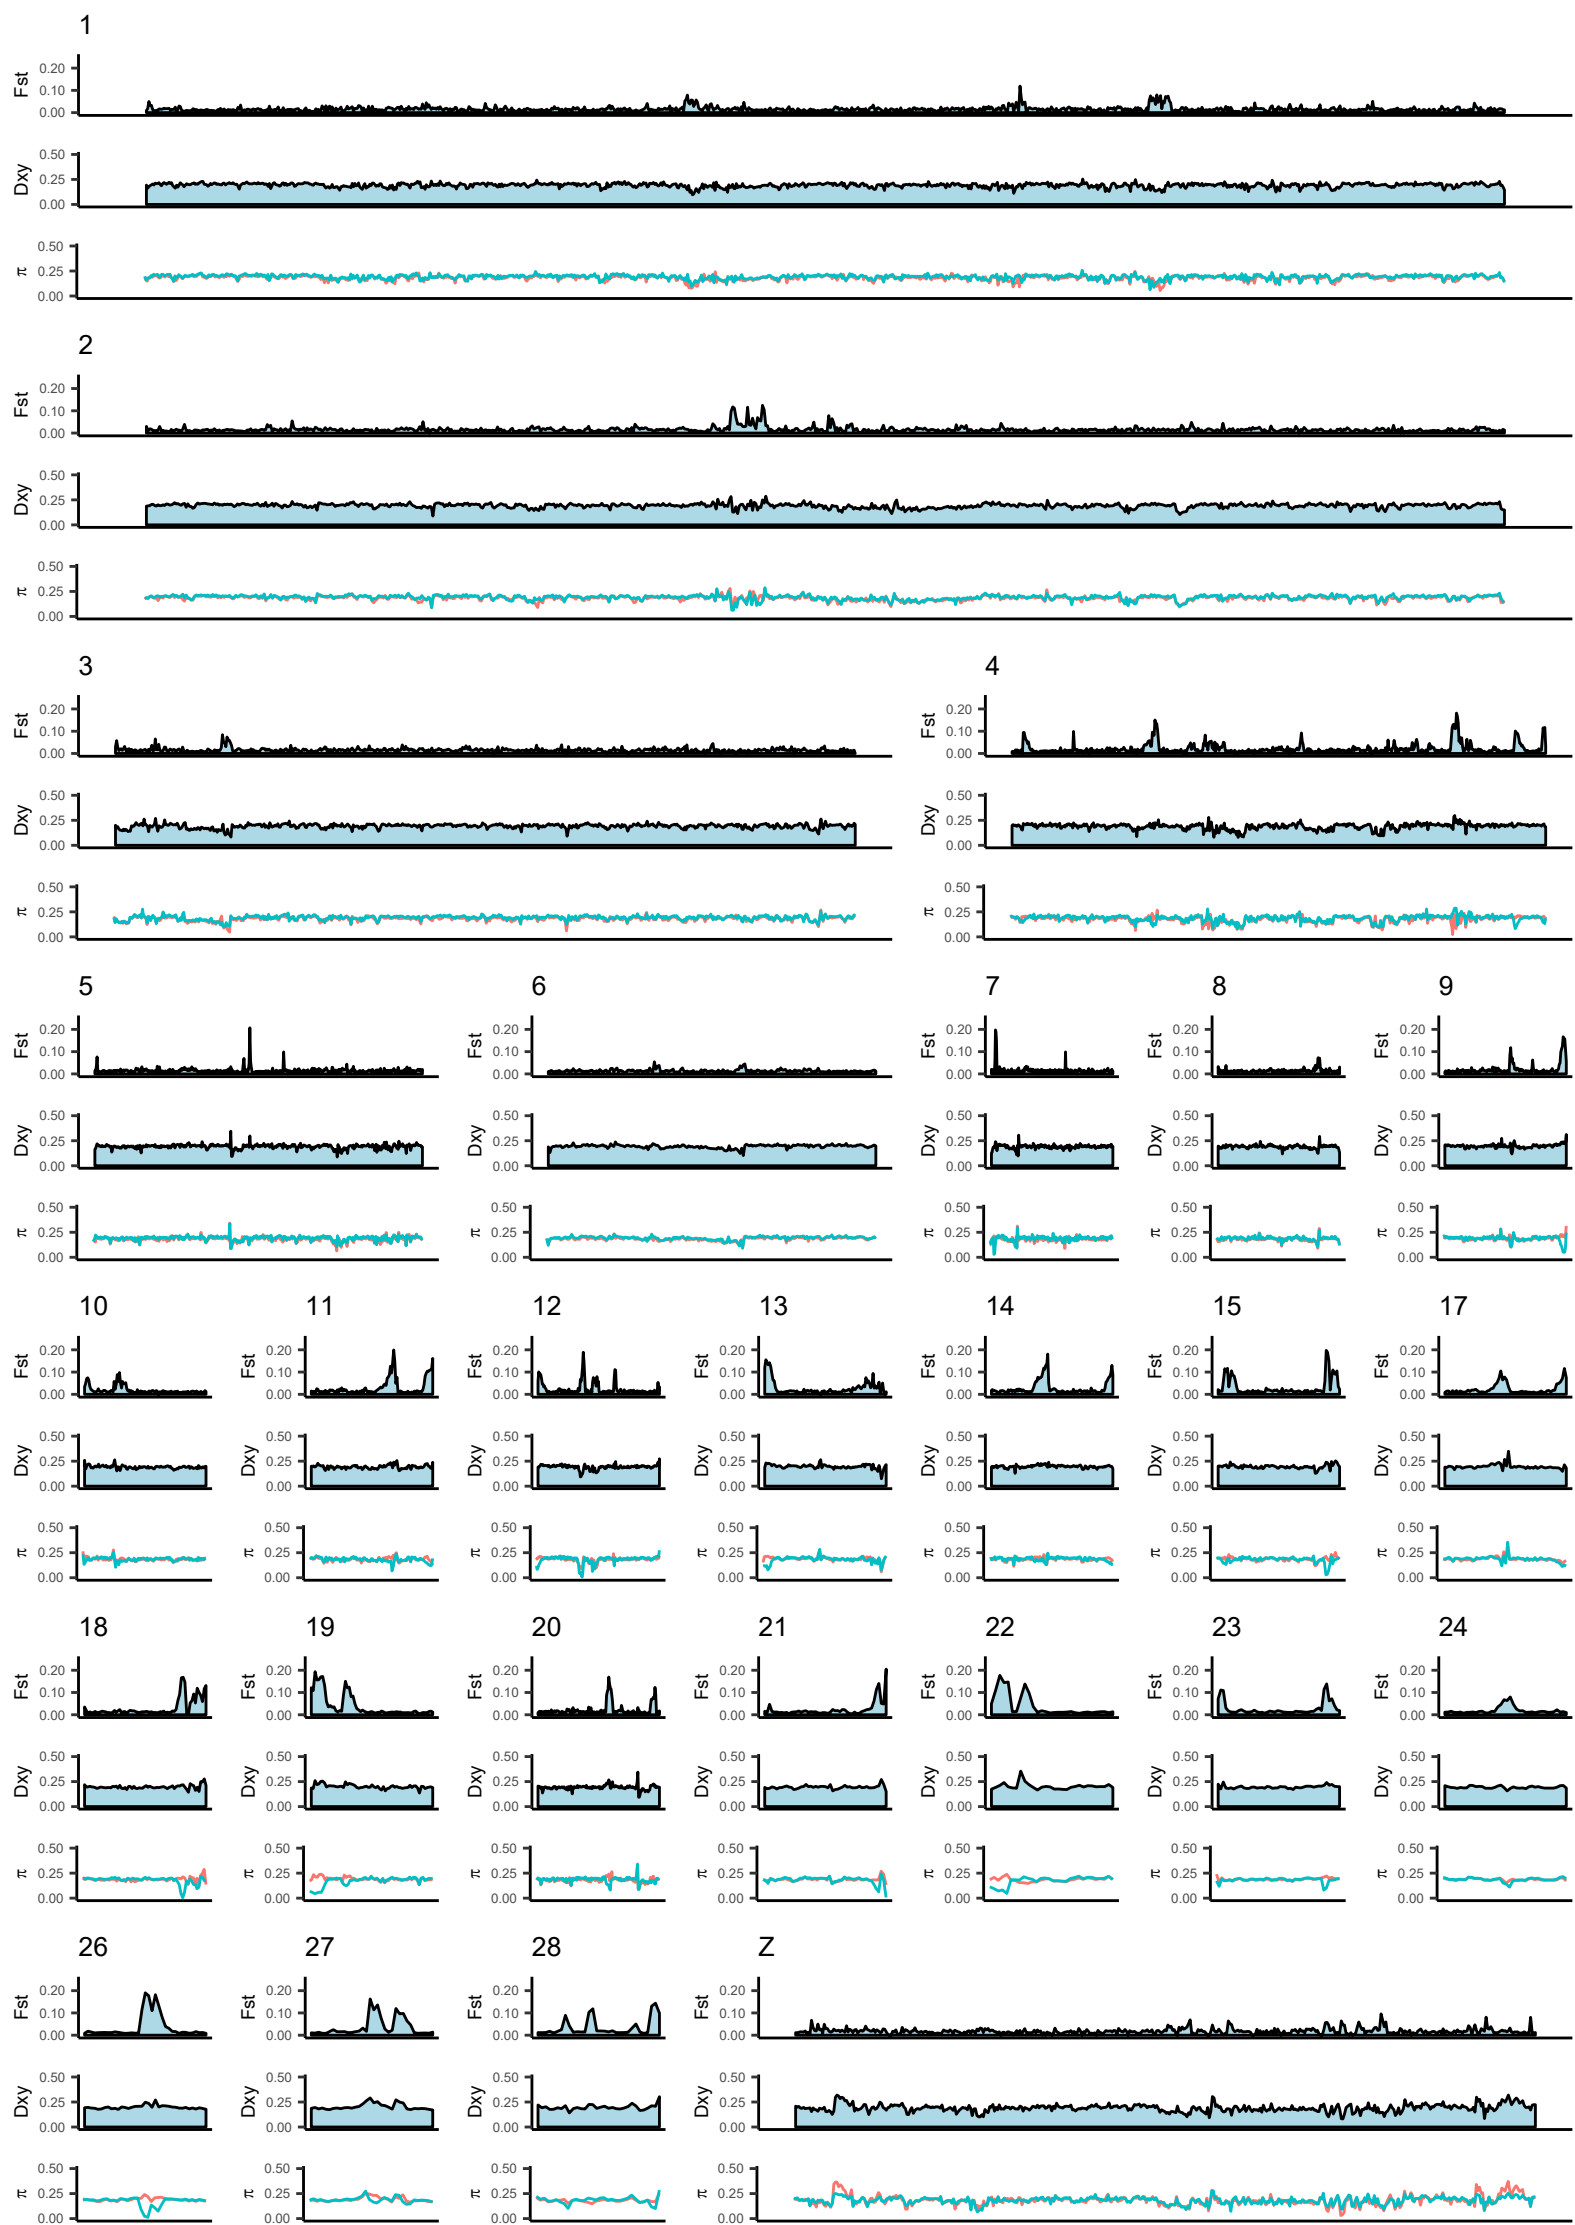

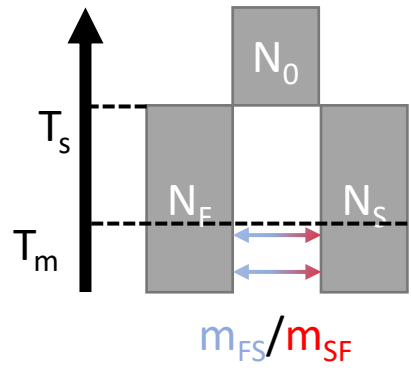

No expansion

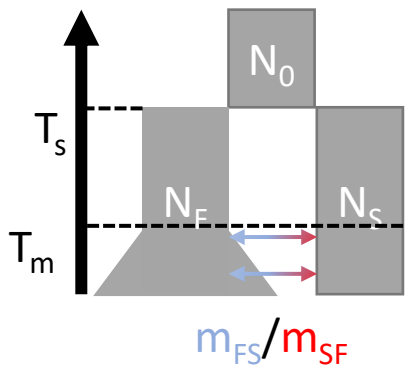

Expansion  
Population 1 ( $N_F$ )

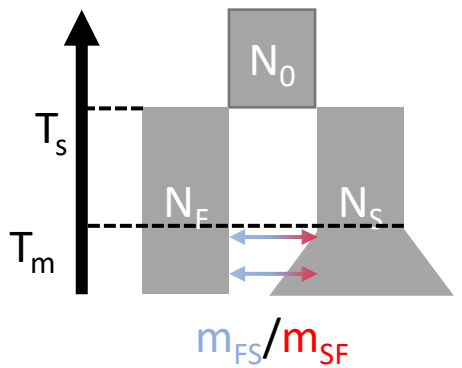

Expansion  
Population 2 ( $N_S$ )

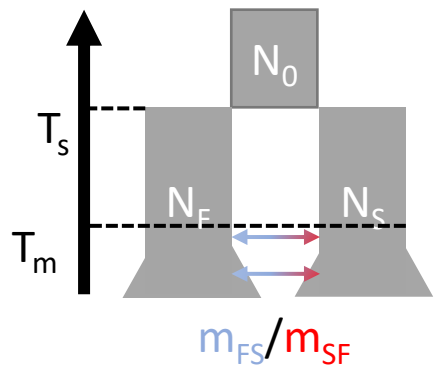

Expansion  
Population 1 & 2 ( $N_F$  &  $N_S$ )

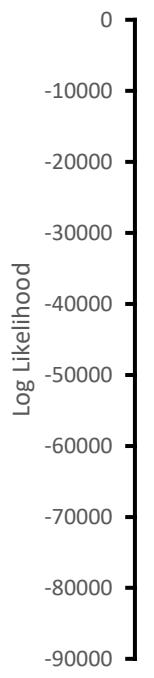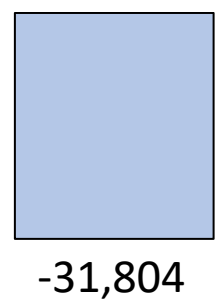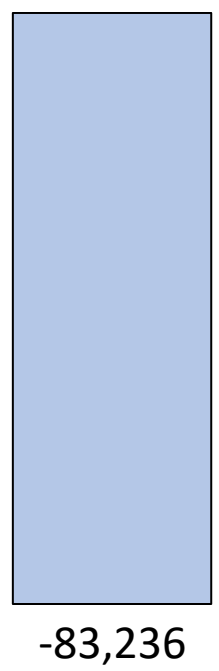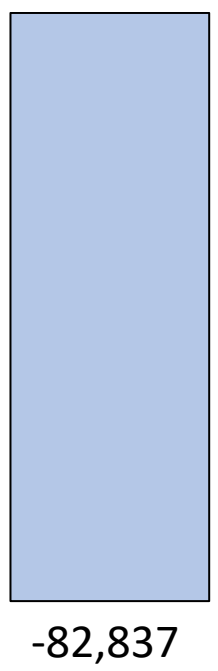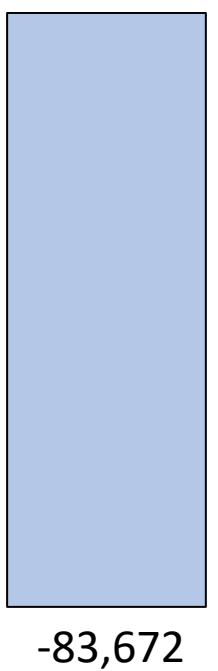

Supplement: 41437_2020_322_MOESM1_ESM.pdf [file 41437_2020_322_MOESM1_ESM.pdf]
